# Supplementary material for: Use of whole genome sequencing to investigate an increase in Neisseria gonorrhoeae infection among women in urban areas of Australia
Source: PubMed Central journal article supplement (PMC5784116; doi:10.1038/s41598-018-20015-x), 2018-01-24
Supplement: 41598_2018_20015_MOESM1_ESM.pdf [file 41598_2018_20015_MOESM1_ESM.pdf]

**Use of whole genome sequencing to investigate an increase in *Neisseria gonorrhoeae* infection among women in urban areas of Australia.**

Cameron Buckley<sup>1</sup>, Brian M. Forde<sup>2,3,4</sup>, Ella Trembizki<sup>1</sup>, Monica M. Lahra<sup>5,6</sup>, Scott A. Beatson<sup>2,3,4</sup> and David M. Whiley<sup>1,2,7\*</sup>.

<sup>1</sup> The University of Queensland, UQ Centre for Clinical Research, Herston, Queensland 4029, Australia.

<sup>2</sup> Australian Infectious Diseases Research Centre, The University of Queensland, Brisbane, Queensland 4072, Australia.

<sup>3</sup> Australian Centre for Ecogenomics, The University of Queensland, Brisbane, Queensland 4072, Australia.

<sup>4</sup> School of Chemistry and Molecular Biosciences, The University of Queensland, Brisbane, Queensland, 4072 Australia.

<sup>5</sup> WHO Collaborating Centre for STD, Microbiology Department, New South Wales Health Pathology East, Prince of Wales Hospital, Sydney, New South Wales 2031, Australia.

<sup>6</sup> School of Medical Sciences, The University of New South Wales, Sydney, New South Wales 2052, Australia.

<sup>7</sup> Pathology Queensland, Microbiology Department, Herston, Queensland 4029, Australia.

\* Corresponding Author: David. M. Whiley. The University of Queensland, UQ Centre for Clinical Research, Herston, Queensland 4029, Australia. ([d.whiley@uq.edu.au](mailto:d.whiley@uq.edu.au))

**Table S1.** Phylogenetic clusters and their associated metadata

| <b>Cluster</b> | <b>SNP range in each cluster (min-max)*</b> | <b>Isolate year of collection</b> | <b>Age groups</b>    | <b>Cervical/vaginal sample %</b> | <b>Throat sample %</b> |
|----------------|---------------------------------------------|-----------------------------------|----------------------|----------------------------------|------------------------|
| C1             | 0-6                                         | 2012 only                         | 18-24 to 45-54       | 33%                              | 67%                    |
| C2             | 0-4                                         | 2012 only                         | 25-34 to 45-54       | 33%                              | 67%                    |
| C3             | 1-19                                        | 2012 and 2014                     | 18-24 to 55 and over | 57%                              | 36%                    |
| C4             | 0-21                                        | 2012 and 2014                     | 18-25 to 55 and over | 65%                              | 35%                    |
| C5             | 1-14                                        | 2012 and 2014                     | 18-25 to 55 and over | 58%                              | 42%                    |

\*SNP, single nucleotide polymorphism.

**Table S2.** New South Wales isolate metadata, genotyping and phylogenetic information

| Strain ID  | Specimen type    | Age grouping | Collection (Month/Year) | Patient with >1 sample | MLST* | NG-MAST* | POR  | TBPB | Cluster assigned in phylogeny | Strains sharing identical core SNPs* |
|------------|------------------|--------------|-------------------------|------------------------|-------|----------|------|------|-------------------------------|--------------------------------------|
| AU2012-573 | cervical/vaginal | 25-34        | 05/2012                 |                        | 7359  | 4186     | 2569 | 241  | Not assigned                  |                                      |
| AU2014-654 | cervical/vaginal | 18-24        | 04/2014                 |                        | 7359  | 4186     | 2569 | 241  | Not assigned                  |                                      |
| AU2012-646 | cervical/vaginal | 25-34        | 05/2012                 |                        | 7359  | 4186     | 2569 | 241  | Not assigned                  |                                      |
| AU2012-768 | throat           | 18-24        | 06/2012                 |                        | 7359  | 15344    | 8931 | 241  | Not assigned                  |                                      |
| AU2012-574 | cervical/vaginal | 25-34        | 06/2012                 |                        | 7359  | 4186     | 2569 | 241  | Not assigned                  |                                      |
| AU2012-511 | cervical/vaginal | 18-24        | 06/2012                 |                        | 7359  | 4186     | 2569 | 241  | Not assigned                  |                                      |
| AU2012-336 | throat           | 35-44        | 02/2012                 |                        | 7359  | 4186     | 2569 | 241  | C1                            |                                      |
| AU2012-249 | throat           | 25-34        | 02/2012                 |                        | 7359  | 4186     | 2569 | 241  | C1                            |                                      |
| AU2012-63  | throat           | 35-44        | 01/2012                 |                        | 7359  | 4186     | 2569 | 241  | C1                            | G1                                   |
| AU2012-57  | cervical/vaginal | 45-54        | 01/2012                 |                        | 7359  | 4186     | 2569 | 241  | C1                            | G1                                   |
| AU2012-65  | throat           | 18-24        | 01/2012                 |                        | 7359  | 4186     | 2569 | 241  | C1                            |                                      |
| AU2012-341 | cervical/vaginal | 25-34        | 02/2012                 |                        | 7359  | 4186     | 2569 | 241  | C1                            |                                      |
| AU2014-637 | cervical/vaginal | 18-24        | 03/2014                 |                        | 7359  | 4186     | 2569 | 241  | Not assigned                  |                                      |
| AU2012-161 | cervical/vaginal | 25-34        | 01/2012                 |                        | 7359  | 4186     | 2569 | 241  | Not assigned                  |                                      |
| AU2014-661 | cervical/vaginal | 18-24        | 04/2014                 |                        | 7359  | 4186     | 2569 | 241  | Not assigned                  |                                      |
| AU2012-70  | cervical/vaginal | 18-24        | 01/2012                 |                        | 7359  | 4186     | 2569 | 241  | Not assigned                  |                                      |
| AU2012-62  | cervical/vaginal | 45-54        | 01/2012                 |                        | 7359  | 4186     | 2569 | 241  | Not assigned                  |                                      |
| AU2012-167 | cervical/vaginal | 25-34        | 01/2012                 |                        | 7359  | 4186     | 2569 | 241  | Not assigned                  |                                      |
| AU2012-237 | throat           | 45-54        | 02/2012                 |                        | 7359  | 4186     | 2569 | 241  | C2                            | G2                                   |
| AU2012-425 | throat           | 45-54        | 03/2012                 |                        | 7359  | 15348    | 8935 | 241  | C2                            | G2                                   |
| AU2012-250 | cervical/vaginal | 25-34        | 05/2012                 |                        | 7359  | 6767     | 4059 | 241  | C2                            |                                      |
| AU2012-338 | throat           | 35-44        | 02/2012                 |                        | 7359  | 4186     | 2569 | 241  | C2                            |                                      |
| AU2012-416 | throat           | 45-54        | 04/2012                 |                        | 7359  | 4186     | 2569 | 241  | C2                            |                                      |
| AU2012-510 | cervical/vaginal | 45-54        | 05/2012                 |                        | 7359  | 4186     | 2569 | 241  | C2                            |                                      |

| Strain ID  | Specimen type    | Age grouping | Collection (Month/Year) | Patient with >1 sample | MLST* | NG-MAST* | POR  | TBPB | Cluster assigned in phylogeny | Strains sharing identical core SNPs* |
|------------|------------------|--------------|-------------------------|------------------------|-------|----------|------|------|-------------------------------|--------------------------------------|
| AU2012-248 | cervical/vaginal | 55 and over  | 01/2012                 |                        | 7359  | 4186     | 2569 | 241  | Not assigned                  |                                      |
| AU2014-622 | throat           | 55 and over  | 02/2014                 |                        | 7359  | 4186     | 2569 | 241  | C3                            |                                      |
| AU2014-595 | rectal           | 25-34        | 01/2014                 | PD                     | 7359  | 4186     | 2569 | 241  | C3                            |                                      |
| AU2014-596 | throat           | 25-34        | 01/2014                 | PD                     | 7359  | 4186     | 2569 | 241  | C3                            |                                      |
| AU2014-594 | cervical/vaginal | 25-34        | 01/2014                 | PD                     | 7359  | 4186     | 2569 | 241  | C3                            |                                      |
| AU2014-665 | cervical/vaginal | 55 and over  | 04/2014                 |                        | 7359  | 4186     | 2569 | 241  | C3                            |                                      |
| AU2014-634 | cervical/vaginal | 18-24        | 02/2014                 |                        | 7359  | 4186     | 2569 | 241  | C3                            |                                      |
| AU2014-607 | cervical/vaginal | 18-24        | 01/2014                 |                        | 7359  | 4186     | 2569 | 241  | C3                            |                                      |
| AU2012-758 | throat           | 25-34        | 06/2012                 |                        | 7359  | 4186     | 2569 | 241  | C3                            |                                      |
| AU2014-647 | cervical/vaginal | 18-24        | 03/2014                 |                        | 7359  | 4186     | 2569 | 241  | C3                            |                                      |
| AU2014-579 | cervical/vaginal | 18-24        | 01/2014                 |                        | 7359  | 4186     | 2569 | 241  | C3                            |                                      |
| AU2012-500 | cervical/vaginal | 18-24        | 05/2012                 |                        | 7359  | 4186     | 2569 | 241  | C3                            |                                      |
| AU2014-612 | throat           | 18-24        | 02/2014                 | PE                     | 7359  | 4186     | 2569 | 241  | C3                            |                                      |
| AU2014-602 | throat           | 25-34        | 01/2014                 |                        | 7359  | 4186     | 2569 | 241  | C3                            |                                      |
| AU2014-606 | cervical/vaginal | 18-24        | 01/2014                 | PE                     | 7359  | 4186     | 2569 | 241  | C3                            |                                      |
| AU2012-155 | throat           | 45-54        | 01/2012                 |                        | 7359  | 4186     | 2569 | 241  | Not assigned                  |                                      |
| AU2012-331 | cervical/vaginal | 45-54        | 02/2012                 |                        | 7359  | 4186     | 2569 | 241  | Not assigned                  |                                      |
| AU2012-168 | throat           | 35-44        | 01/2012                 |                        | 7359  | 4186     | 2569 | 241  | C4                            |                                      |
| AU2012-698 | throat           | 55 and over  | 02/2012                 |                        | 7359  | 4186     | 2569 | 241  | C4                            |                                      |
| AU2012-701 | cervical/vaginal | 25-34        | 03/2012                 |                        | 7359  | 4186     | 2569 | 241  | C4                            |                                      |
| AU2012-648 | cervical/vaginal | 25-34        | 03/2012                 |                        | 7359  | 4186     | 2569 | 241  | C4                            |                                      |
| AU2012-497 | throat           | 25-34        | 05/2012                 |                        | 7359  | 4186     | 2569 | 241  | C4                            |                                      |
| AU2014-686 | cervical/vaginal | 25-34        | 06/2014                 | PF                     | 7359  | 4186     | 2569 | 241  | C4                            |                                      |

| Strain ID  | Specimen type    | Age grouping | Collection (Month/Year) | Patient with >1 sample | MLST* | NG-MAST* | POR  | TBPB | Cluster assigned in phylogeny | Strains sharing identical core SNPs* |
|------------|------------------|--------------|-------------------------|------------------------|-------|----------|------|------|-------------------------------|--------------------------------------|
| AU2014-694 | cervical/vaginal | 25-34        | 06/2014                 | PF                     | 7359  | 4186     | 2569 | 241  | C4                            |                                      |
| AU2014-653 | throat           | 25-34        | 04/2014                 |                        | 7359  | 4186     | 2569 | 241  | C4                            |                                      |
| AU2014-682 | cervical/vaginal | 25-34        | 05/2014                 |                        | 7359  | 4186     | 2569 | 241  | C4                            |                                      |
| AU2012-166 | throat           | 35-44        | 01/2012                 |                        | 7359  | 4186     | 2569 | 241  | C4                            |                                      |
| AU2012-325 | cervical/vaginal | 25-34        | 03/2012                 |                        | 7359  | 4186     | 2569 | 241  | C4                            |                                      |
| AU2012-340 | throat           | 35-44        | 03/2012                 | PC                     | 7359  | 4186     | 2569 | 241  | C4                            |                                      |
| AU2012-319 | throat           | 35-44        | 03/2012                 | PC                     | 7359  | 4186     | 2569 | 241  | C4                            |                                      |
| AU2012-241 | cervical/vaginal | 55 and over  | 02/2012                 |                        | 7359  | 4186     | 2569 | 241  | C4                            |                                      |
| AU2012-323 | cervical/vaginal | 45-54        | 03/2012                 |                        | 7359  | 4186     | 2569 | 241  | C4                            | G6                                   |
| AU2012-332 | cervical/vaginal | 55 and over  | 02/2012                 |                        | 7359  | 4186     | 2569 | 241  | C4                            | G6                                   |
| AU2012-329 | cervical/vaginal | 18-24        | 03/2012                 |                        | 7359  | 4186     | 2569 | 241  | C4                            |                                      |
| AU2012-73  | cervical/vaginal | 25-34        | 01/2012                 |                        | 7359  | 4186     | 2569 | 241  | C4                            |                                      |
| AU2014-645 | cervical/vaginal | 18-24        | 03/2014                 |                        | 7359  | 4186     | 2569 | 241  | C4                            |                                      |
| AU2014-651 | cervical/vaginal | 55 and over  | 03/2014                 |                        | 7359  | 4186     | 2569 | 241  | C4                            |                                      |
| AU2012-649 | cervical/vaginal | 35-44        | 05/2012                 |                        | 7359  | 4186     | 2569 | 241  | C4                            | G3                                   |
| AU2012-420 | throat           | 35-44        | 03/2012                 |                        | 7359  | 4186     | 2569 | 241  | C4                            | G3                                   |
| AU2012-807 | cervical/vaginal | 18-24        | 05/2012                 |                        | 7359  | 4186     | 2569 | 241  | C4                            | G3                                   |
| AU2012-75  | cervical/vaginal | 25-34        | 01/2012                 | PA                     | 7359  | 4186     | 2569 | 241  | C4                            | G4                                   |
| AU2012-74  | throat           | 25-34        | 01/2012                 | PA                     | 7359  | 4186     | 2569 | 241  | C4                            | G4                                   |
| AU2012-61  | cervical/vaginal | 55 and over  | 01/2012                 | PB                     | 7359  | 4186     | 2569 | 241  | C4                            |                                      |
| AU2012-162 | cervical/vaginal | 55 and over  | 01/2012                 | PB                     | 7359  | 6767     | 4059 | 241  | C4                            |                                      |
| AU2012-165 | throat           | 35-44        | 01/2012                 |                        | 7359  | 4186     | 2569 | 241  | C4                            |                                      |

| Strain ID  | Specimen type    | Age grouping | Collection (Month/Year) | Patient with >1 sample | MLST* | NG-MAST* | POR  | TBPB | Cluster assigned in phylogeny | Strains sharing identical core SNPs* |
|------------|------------------|--------------|-------------------------|------------------------|-------|----------|------|------|-------------------------------|--------------------------------------|
| AU2012-240 | cervical/vaginal | 25-34        | 02/2012                 |                        | 7359  | 4186     | 2569 | 241  | C4                            |                                      |
| AU2012-767 | throat           | 25-34        | 06/2012                 |                        | 7359  | 4186     | 2569 | 241  | C4                            |                                      |
| AU2014-574 | cervical/vaginal | 18-24        | 01/2014                 |                        | 7359  | 4186     | 2569 | 241  | C4                            | G5                                   |
| AU2014-593 | cervical/vaginal | 18-24        | 01/2014                 |                        | 7359  | 4186     | 2569 | 241  | C4                            | G5                                   |
| AU2014-580 | cervical/vaginal | 25-34        | 01/2014                 |                        | 7359  | 4186     | 2569 | 241  | C4                            |                                      |
| AU2012-572 | throat           | 35-44        | 05/2012                 |                        | 7359  | 4186     | 2569 | 241  | C4                            |                                      |
| AU2012-502 | throat           | 25-34        | 05/2012                 |                        | 7359  | 15609    | 9143 | 241  | Not assigned                  |                                      |
| AU2012-418 | cervical/vaginal | 18-24        | 03/2012                 |                        | 7359  | 4186     | 2569 | 241  | Not assigned                  |                                      |
| AU2014-589 | cervical/vaginal | 18-24        | 01/2014                 |                        | 7359  | 4186     | 2569 | 241  | Not assigned                  |                                      |
| AU2012-68  | cervical/vaginal | 45-54        | 02/2012                 |                        | 7359  | 4186     | 2569 | 241  | Not assigned                  |                                      |
| AU2012-700 | cervical/vaginal | 25-34        | 04/2012                 |                        | 7359  | 4186     | 2569 | 241  | Not assigned                  |                                      |
| AU2012-60  | cervical/vaginal | 35-44        | 02/2012                 |                        | 7359  | 4186     | 2569 | 241  | Not assigned                  |                                      |
| AU2012-501 | cervical/vaginal | 25-34        | 05/2012                 |                        | 7359  | 4186     | 2569 | 241  | C5                            |                                      |
| AU2012-417 | cervical/vaginal | 55 and over  | 03/2012                 |                        | 7359  | 4186     | 2569 | 241  | C5                            |                                      |
| AU2014-613 | throat           | 18-24        | 02/2014                 |                        | 7359  | 4186     | 2569 | 241  | C5                            |                                      |
| AU2014-635 | throat           | 25-34        | 03/2014                 |                        | 7359  | 6759     | 4057 | 241  | C5                            |                                      |
| AU2014-663 | cervical/vaginal | 18-24        | 04/2014                 |                        | 7359  | 15344    | 8931 | 241  | C5                            |                                      |
| AU2014-586 | cervical/vaginal | 18-24        | 01/2014                 |                        | 7359  | 4186     | 2569 | 241  | C5                            |                                      |
| AU2014-690 | throat           | 18-24        | 06/2014                 |                        | 7359  | 6759     | 4057 | 241  | C5                            |                                      |
| AU2014-693 | cervical/vaginal | 18-24        | 06/2014                 |                        | 7359  | 4186     | 2569 | 241  | C5                            |                                      |
| AU2014-680 | throat           | 35-44        | 05/2014                 |                        | 7359  | 4186     | 2569 | 241  | C5                            |                                      |
| AU2014-620 | throat           | 18-24        | 02/2014                 |                        | 7359  | 4186     | 2569 | 241  | C5                            |                                      |
| AU2014-697 | cervical/vaginal | 25-34        | 06/2014                 |                        | 7359  | 4186     | 2569 | 241  | C5                            |                                      |
| AU2014-684 | cervical/vaginal | 35-44        | 05/2014                 |                        | 7359  | 4186     | 2569 | 241  | C5                            |                                      |

| <b>Strain ID</b> | <b>Specimen type</b> | <b>Age grouping</b> | <b>Collection (Month/Year)</b> | <b>Patient with &gt;1 sample</b> | <b>MLST*</b> | <b>NG-MAST*</b> | <b>POR</b> | <b>TBPB</b> | <b>Cluster assigned in phylogeny</b> | <b>Strains sharing identical core SNPs*</b> |
|------------------|----------------------|---------------------|--------------------------------|----------------------------------|--------------|-----------------|------------|-------------|--------------------------------------|---------------------------------------------|
| AU2012-238       | eye                  | 18-24               | 02/2012                        |                                  | 7359         | 4186            | 2569       | 241         | Not assigned                         |                                             |

\*MLST, multilocus sequence type; NG-MAST, *Neisseria gonorrhoeae* multi-antigen sequence type; SNPs, single nucleotide polymorphisms.

**Table S3.** Resistance markers for all isolates comprising the G122 genotype.

| <b>Gene marker of Interest</b> | <b>Present/Absent or Wild-type/Mutant</b> |
|--------------------------------|-------------------------------------------|
| PBP2 D345 ins                  | Present                                   |
| porB1b G101                    | Wild-type                                 |
| porB1b A102                    | Wild-type                                 |
| gyrA S91                       | Wild-type                                 |
| gyrA D95                       | Wild-type                                 |
| parC D86                       | Wild-type                                 |
| parC S87                       | Wild-type                                 |
| parC S88                       | Wild-type                                 |
| parE G410                      | Wild-type                                 |
| rpoB H552                      | Wild-type                                 |
| rpsJ v57                       | Wild-type                                 |
| folP R228                      | Wild-type                                 |
| ponA1 L421                     | Wild-type                                 |
| mtrR G45                       | Wild-type                                 |
| PBP2 A311                      | Wild-type                                 |
| PBP2 I312                      | Wild-type                                 |
| PBP2 V316                      | Wild-type                                 |
| PBP2 T483                      | Wild-type                                 |
| PBP2 G545                      | Wild-type                                 |
| PBP2 A501                      | Wild-type                                 |
| PBP2 G542                      | Wild-type                                 |
| PBP2 P551                      | Wild-type                                 |
| 23S 2059*                      | Wild-type                                 |
| 23S 2611*                      | Wild-type                                 |

\*Both 23S mutations were detected using BIGSdb (<https://pubmlst.org/software/database/bigfdb/>).



**Table S4.** Sequence read and assembly metrics for all New South Wales isolates

| Strain ID  | SRA Accession No. | Total bp | Ns (bp) | Total reads | Phred | Average quality | Depth | Contigs | Average contig size (bp) | Maximum contig size (bp) | N50 (bp) |
|------------|-------------------|----------|---------|-------------|-------|-----------------|-------|---------|--------------------------|--------------------------|----------|
| AU2012-155 | SRR5801862        | 2161415  | 187     | 3878998     | 33    | 34.1            | 211x  | 281     | 7691                     | 207485                   | 67601    |
| AU2012-161 | SRR5801863        | 2148888  | 172     | 4580264     | 33    | 34.3            | 249x  | 202     | 10638                    | 208225                   | 72540    |
| AU2012-162 | SRR5801864        | 2156075  | 172     | 3883220     | 33    | 34.5            | 212x  | 226     | 9540                     | 207466                   | 52268    |
| AU2012-165 | SRR5801865        | 2171196  | 329     | 4211752     | 33    | 34.6            | 228x  | 264     | 8224                     | 207466                   | 52955    |
| AU2012-166 | SRR5801851        | 2166498  | 550     | 3717494     | 33    | 33.8            | 202x  | 279     | 7765                     | 207486                   | 49447    |
| AU2012-167 | SRR5801866        | 2148757  | 174     | 4484230     | 33    | 34.6            | 243x  | 221     | 9722                     | 207471                   | 67601    |
| AU2012-168 | SRR5801867        | 2155756  | 174     | 4052462     | 33    | 34.6            | 220x  | 218     | 9888                     | 207466                   | 52403    |
| AU2012-237 | SRR5801879        | 2154101  | 174     | 3901672     | 33    | 34.5            | 212x  | 197     | 10934                    | 211214                   | 52438    |
| AU2012-238 | SRR5801881        | 2159696  | 172     | 4151712     | 33    | 34.6            | 225x  | 211     | 10235                    | 207486                   | 52430    |
| AU2012-240 | SRR5801880        | 2153010  | 180     | 3592010     | 33    | 34.5            | 195x  | 209     | 10301                    | 207466                   | 67556    |
| AU2012-241 | SRR5801878        | 2153907  | 7       | 3846260     | 33    | 34.5            | 208x  | 220     | 9790                     | 207478                   | 67556    |
| AU2012-248 | SRR5801868        | 2171941  | 173     | 4169658     | 33    | 34.7            | 226x  | 273     | 7955                     | 207470                   | 67556    |
| AU2012-249 | SRR5801877        | 2151488  | 173     | 3658062     | 33    | 34.6            | 199x  | 219     | 9824                     | 207465                   | 49045    |
| AU2012-250 | SRR5801808        | 2148699  | 179     | 5378114     | 33    | 34.2            | 291x  | 201     | 10690                    | 211399                   | 52438    |
| AU2012-319 | SRR5801893        | 2143904  | 172     | 3571752     | 33    | 34.3            | 194x  | 188     | 11403                    | 207466                   | 67601    |
| AU2012-323 | SRR5801892        | 2151119  | 174     | 3458586     | 33    | 34.6            | 188x  | 210     | 10243                    | 207471                   | 52430    |
| AU2012-325 | SRR5801876        | 2146381  | 173     | 3715372     | 33    | 34.5            | 202x  | 208     | 10319                    | 207466                   | 67644    |
| AU2012-329 | SRR5801895        | 2142204  | 174     | 3672470     | 33    | 34.2            | 200x  | 197     | 10874                    | 207365                   | 67556    |
| AU2012-331 | SRR5801883        | 2174483  | 174     | 3794450     | 33    | 34.8            | 206x  | 264     | 8236                     | 207464                   | 52430    |
| AU2012-332 | SRR5801871        | 2157811  | 174     | 4234652     | 33    | 34.5            | 230x  | 235     | 9182                     | 207466                   | 49411    |
| AU2012-336 | SRR5801870        | 2165094  | 174     | 4382356     | 33    | 34.7            | 237x  | 234     | 9252                     | 207466                   | 50074    |
| AU2012-338 | SRR5801882        | 2156764  | 174     | 3440720     | 33    | 34.5            | 187x  | 234     | 9216                     | 207466                   | 67556    |

| Strain ID  | SRA Accession No. | Total bp | Ns (bp) | Total reads | Phred | Average quality | Depth | Contigs | Average contig size (bp) | Maximum contig size (bp) | N50 (bp) |
|------------|-------------------|----------|---------|-------------|-------|-----------------|-------|---------|--------------------------|--------------------------|----------|
| AU2012-340 | SRR5801890        | 2147108  | 179     | 3765290     | 33    | 34.6            | 206x  | 224     | 9585                     | 207486                   | 72540    |
| AU2012-341 | SRR5801869        | 2153051  | 181     | 4111608     | 33    | 34.6            | 223x  | 215     | 10014                    | 207466                   | 52426    |
| AU2012-416 | SRR5801807        | 2151348  | 174     | 4364754     | 33    | 33.5            | 238x  | 208     | 10343                    | 212034                   | 67556    |
| AU2012-417 | SRR5801891        | 2149846  | 172     | 4677196     | 33    | 34.8            | 254x  | 222     | 9683                     | 211762                   | 52426    |
| AU2012-418 | SRR5801886        | 2150563  | 179     | 4586250     | 33    | 33.2            | 250x  | 222     | 9687                     | 207466                   | 57673    |
| AU2012-420 | SRR5801889        | 2157363  | 174     | 4306020     | 33    | 33.4            | 234x  | 222     | 9717                     | 208226                   | 53583    |
| AU2012-425 | SRR5801887        | 2152533  | 174     | 4169626     | 33    | 33.4            | 227x  | 213     | 10105                    | 212048                   | 53604    |
| AU2012-497 | SRR5801819        | 2144872  | 172     | 3507340     | 33    | 34.2            | 191x  | 230     | 9325                     | 207466                   | 67601    |
| AU2012-500 | SRR5801802        | 2149536  | 180     | 3878924     | 33    | 34.2            | 211x  | 216     | 9951                     | 207467                   | 67644    |
| AU2012-501 | SRR5801818        | 2147787  | 179     | 3557142     | 33    | 34.5            | 194x  | 215     | 9989                     | 211831                   | 67644    |
| AU2012-502 | SRR5801817        | 2149049  | 172     | 3620054     | 33    | 34.2            | 198x  | 234     | 9183                     | 210651                   | 67640    |
| AU2012-510 | SRR5801809        | 2150545  | 180     | 4013472     | 33    | 33.3            | 219x  | 189     | 11378                    | 212409                   | 72540    |
| AU2012-511 | SRR5801813        | 2154150  | 174     | 3622838     | 33    | 34              | 198x  | 218     | 9881                     | 207486                   | 67556    |
| AU2012-57  | SRR5801846        | 2154687  | 172     | 3164986     | 33    | 33.5            | 173x  | 208     | 10359                    | 207486                   | 66275    |
| AU2012-572 | SRR5801803        | 2154248  | 179     | 4113282     | 33    | 34.3            | 224x  | 219     | 9836                     | 208224                   | 67644    |
| AU2012-573 | SRR5801816        | 2149879  | 172     | 3816806     | 33    | 34.2            | 208x  | 207     | 10385                    | 207365                   | 67556    |
| AU2012-574 | SRR5801812        | 2150891  | 172     | 3995768     | 33    | 34.3            | 218x  | 229     | 9392                     | 207486                   | 67644    |
| AU2012-60  | SRR5801884        | 2145331  | 173     | 4998902     | 33    | 34.9            | 271x  | 195     | 11001                    | 212044                   | 67601    |
| AU2012-61  | SRR5801850        | 2156924  | 174     | 4197062     | 33    | 34.2            | 228x  | 235     | 9178                     | 208226                   | 52434    |
| AU2012-62  | SRR5801848        | 2172672  | 173     | 4219936     | 33    | 33.9            | 230x  | 270     | 8046                     | 207466                   | 49447    |
| AU2012-63  | SRR5801842        | 2160000  | 172     | 3680228     | 33    | 34.1            | 200x  | 246     | 8780                     | 207466                   | 49447    |
| AU2012-646 | SRR5801810        | 2151299  | 179     | 3828924     | 33    | 33              | 209x  | 206     | 10443                    | 207466                   | 67556    |
| AU2012-648 | SRR5801806        | 2147749  | 180     | 4271988     | 33    | 33.5            | 233x  | 225     | 9545                     | 207478                   | 67644    |

| Strain ID  | SRA Accession No. | Total bp | Ns (bp) | Total reads | Phred | Average quality | Depth | Contigs | Average contig size (bp) | Maximum contig size (bp) | N50 (bp) |
|------------|-------------------|----------|---------|-------------|-------|-----------------|-------|---------|--------------------------|--------------------------|----------|
| AU2012-649 | SRR5801811        | 2148807  | 182     | 4130786     | 33    | 33.7            | 225x  | 212     | 10135                    | 207438                   | 67556    |
| AU2012-65  | SRR5801845        | 2152675  | 173     | 3991296     | 33    | 33.8            | 218x  | 225     | 9567                     | 207466                   | 52399    |
| AU2012-68  | SRR5801885        | 2156012  | 174     | 3888914     | 33    | 34.7            | 212x  | 221     | 9755                     | 207471                   | 72540    |
| AU2012-698 | SRR5801894        | 2149342  | 172     | 3800734     | 33    | 34.4            | 207x  | 205     | 10484                    | 207438                   | 67556    |
| AU2012-70  | SRR5801849        | 2167537  | 173     | 3626668     | 33    | 33.9            | 198x  | 238     | 9107                     | 207474                   | 49447    |
| AU2012-700 | SRR5801805        | 2154061  | 174     | 4311810     | 33    | 33.2            | 235x  | 213     | 10112                    | 212043                   | 67556    |
| AU2012-701 | SRR5801888        | 2154257  | 174     | 4670058     | 33    | 33.5            | 254x  | 222     | 9703                     | 208226                   | 53604    |
| AU2012-73  | SRR5801847        | 2173798  | 171     | 3996638     | 33    | 33.8            | 218x  | 261     | 8328                     | 207466                   | 52977    |
| AU2012-74  | SRR5801843        | 2150880  | 174     | 3463202     | 33    | 33.8            | 189x  | 219     | 9821                     | 207466                   | 67603    |
| AU2012-75  | SRR5801844        | 2151104  | 183     | 3989426     | 33    | 34              | 217x  | 198     | 10864                    | 207474                   | 49393    |
| AU2012-758 | SRR5801820        | 2143260  | 132     | 3558356     | 33    | 34.3            | 194x  | 205     | 10454                    | 207465                   | 67556    |
| AU2012-767 | SRR5801814        | 2153686  | 174     | 3475670     | 33    | 34.5            | 190x  | 211     | 10207                    | 207465                   | 67556    |
| AU2012-768 | SRR5801815        | 2151064  | 173     | 3358624     | 33    | 34.2            | 183x  | 199     | 10809                    | 207475                   | 67601    |
| AU2012-807 | SRR5801804        | 2146673  | 174     | 4431142     | 33    | 33.3            | 242x  | 209     | 10271                    | 207267                   | 67601    |
| AU2014-574 | SRR5801821        | 2146883  | 174     | 5588486     | 33    | 35              | 301x  | 195     | 11009                    | 207453                   | 52420    |
| AU2014-579 | SRR5801823        | 2147032  | 172     | 3912014     | 33    | 34.5            | 214x  | 232     | 9254                     | 207437                   | 49069    |
| AU2014-580 | SRR5801822        | 2146436  | 172     | 3096932     | 33    | 34.1            | 169x  | 226     | 9497                     | 207466                   | 57525    |
| AU2014-586 | SRR5801825        | 2154795  | 174     | 3152682     | 33    | 34.3            | 172x  | 223     | 9662                     | 207487                   | 67556    |
| AU2014-589 | SRR5801824        | 2149095  | 173     | 3101244     | 33    | 34.2            | 169x  | 216     | 9949                     | 207466                   | 67556    |
| AU2014-593 | SRR5801827        | 2154287  | 183     | 3177564     | 33    | 34.5            | 173x  | 201     | 10717                    | 207453                   | 67549    |
| AU2014-594 | SRR5801826        | 2152505  | 172     | 3347582     | 33    | 34.3            | 183x  | 242     | 8894                     | 207465                   | 67556    |
| AU2014-595 | SRR5801829        | 2151008  | 173     | 3481212     | 33    | 34.3            | 190x  | 242     | 8888                     | 207465                   | 67556    |
| AU2014-596 | SRR5801828        | 2150788  | 173     | 3261190     | 33    | 34.3            | 178x  | 224     | 9601                     | 207465                   | 68045    |

| Strain ID  | SRA Accession No. | Total bp | Ns (bp) | Total reads | Phred | Average quality | Depth | Contigs | Average contig size (bp) | Maximum contig size (bp) | N50 (bp) |
|------------|-------------------|----------|---------|-------------|-------|-----------------|-------|---------|--------------------------|--------------------------|----------|
| AU2014-602 | SRR5801831        | 2149957  | 172     | 3227520     | 33    | 34.3            | 176x  | 221     | 9728                     | 207466                   | 67556    |
| AU2014-606 | SRR5801830        | 2152059  | 174     | 2708382     | 33    | 34.1            | 147x  | 197     | 10924                    | 207466                   | 69950    |
| AU2014-607 | SRR5801854        | 2152892  | 174     | 2706274     | 33    | 34.3            | 148x  | 212     | 10155                    | 207466                   | 67556    |
| AU2014-612 | SRR5801855        | 2149845  | 172     | 4123412     | 33    | 34.7            | 224x  | 201     | 10695                    | 211764                   | 49058    |
| AU2014-613 | SRR5801852        | 2155584  | 174     | 3277898     | 33    | 34.4            | 179x  | 224     | 9623                     | 207486                   | 72540    |
| AU2014-620 | SRR5801853        | 2151523  | 173     | 3270354     | 33    | 34.4            | 178x  | 214     | 10053                    | 208662                   | 67644    |
| AU2014-622 | SRR5801858        | 2152050  | 174     | 3163238     | 33    | 34.3            | 173x  | 202     | 10653                    | 207466                   | 68045    |
| AU2014-634 | SRR5801859        | 2150775  | 173     | 1806406     | 33    | 33.5            | 99x   | 213     | 10097                    | 207437                   | 52870    |
| AU2014-635 | SRR5801856        | 2149232  | 172     | 2519796     | 33    | 34.2            | 137x  | 196     | 10965                    | 211506                   | 67601    |
| AU2014-637 | SRR5801857        | 2152077  | 180     | 3032860     | 33    | 34.3            | 165x  | 206     | 10446                    | 207487                   | 72540    |
| AU2014-645 | SRR5801860        | 2149092  | 173     | 3139370     | 33    | 34.3            | 171x  | 216     | 9949                     | 207497                   | 67913    |
| AU2014-647 | SRR5801861        | 2147914  | 172     | 3233404     | 33    | 34.1            | 176x  | 210     | 10228                    | 207437                   | 67594    |
| AU2014-651 | SRR5801841        | 2144811  | 173     | 3050624     | 33    | 34.5            | 166x  | 203     | 10565                    | 208230                   | 66275    |
| AU2014-653 | SRR5801840        | 2144069  | 182     | 3005138     | 33    | 34.1            | 164x  | 201     | 10667                    | 207466                   | 52950    |
| AU2014-654 | SRR5801839        | 2144208  | 179     | 2763376     | 33    | 34.1            | 151x  | 217     | 9881                     | 207439                   | 66275    |
| AU2014-661 | SRR5801838        | 2142424  | 112     | 4697752     | 33    | 35.2            | 248x  | 196     | 10930                    | 172608                   | 47484    |
| AU2014-663 | SRR5801837        | 2149021  | 173     | 3710834     | 33    | 34.4            | 203x  | 221     | 9724                     | 210620                   | 67556    |
| AU2014-665 | SRR5801836        | 2146890  | 174     | 3691956     | 33    | 34.3            | 201x  | 210     | 10223                    | 207467                   | 67556    |
| AU2014-680 | SRR5801835        | 2147522  | 173     | 3878502     | 33    | 34.4            | 212x  | 211     | 10177                    | 207497                   | 52430    |
| AU2014-682 | SRR5801834        | 2147047  | 171     | 3623564     | 33    | 34.4            | 198x  | 211     | 10175                    | 207467                   | 67601    |
| AU2014-684 | SRR5801833        | 2145012  | 173     | 3165370     | 33    | 34.5            | 173x  | 199     | 10778                    | 207465                   | 67556    |
| AU2014-686 | SRR5801832        | 2155078  | 174     | 3573652     | 33    | 34.3            | 195x  | 213     | 10117                    | 207471                   | 52438    |
| AU2014-690 | SRR5801872        | 2151751  | 171     | 3954394     | 33    | 34.5            | 216x  | 222     | 9692                     | 211488                   | 67644    |

---

| <b>Strain ID</b> | <b>SRA<br/>Accession No.</b> | <b>Total<br/>bp</b> | <b>Ns<br/>(bp)</b> | <b>Total<br/>reads</b> | <b>Phred</b> | <b>Average<br/>quality</b> | <b>Depth</b> | <b>Contigs</b> | <b>Average<br/>contig<br/>size<br/>(bp)</b> | <b>Maximum<br/>contig size<br/>(bp)</b> | <b>N50<br/>(bp)</b> |
|------------------|------------------------------|---------------------|--------------------|------------------------|--------------|----------------------------|--------------|----------------|---------------------------------------------|-----------------------------------------|---------------------|
| AU2014-693       | SRR5801873                   | 2154484             | 179                | 3361948                | 33           | 34.2                       | 184x         | 204            | 10561                                       | 207478                                  | 66275               |
| AU2014-694       | SRR5801874                   | 2146778             | 173                | 3869124                | 33           | 34.6                       | 211x         | 215            | 9985                                        | 207486                                  | 67594               |
| AU2014-697       | SRR5801875                   | 2149156             | 172                | 3674642                | 33           | 34.3                       | 201x         | 210            | 10234                                       | 211632                                  | 52430               |

---

**Table S5.** Randomly selected isolates representing each multilocus sequence type identified from international collections

| <b>MLST*</b> | <b>Lineage Colour</b> | <b>ID</b>  | <b>Study</b>                 |
|--------------|-----------------------|------------|------------------------------|
| 7359†        | Black                 |            | De Silva et al. <sup>1</sup> |
| 7826         | Black                 | SRR3360636 | De Silva et al. <sup>1</sup> |
| 1594         | Red                   | SRR3360958 | De Silva et al. <sup>1</sup> |
| 1892         | Red                   | SRR3360668 | De Silva et al. <sup>1</sup> |
| 8135         | Red                   | SRR3357253 | De Silva et al. <sup>1</sup> |
| 8394         | Red                   | SRR3349949 | De Silva et al. <sup>1</sup> |
| 11675        | Red                   | SRR1661263 | Demczuk et al. <sup>2</sup>  |
| 11990        | Red                   | SRR3360357 | De Silva et al. <sup>1</sup> |
| 12467        | Red                   | SRR3343539 | De Silva et al. <sup>1</sup> |
| 12525        | Red                   | SRR3360340 | De Silva et al. <sup>1</sup> |
| 12526        | Red                   | SRR3360344 | De Silva et al. <sup>1</sup> |
| 12537        | Red                   | SRR1661236 | Demczuk et al. <sup>2</sup>  |
| Novel-1      | Red                   | SRR1661232 | Demczuk et al. <sup>2</sup>  |
| 1596         | Orange                | SRR3350138 | De Silva et al. <sup>1</sup> |
| 11993        | Orange                | SRR3361170 | De Silva et al. <sup>1</sup> |
| 8122         | Light green           | SRR3361175 | De Silva et al. <sup>1</sup> |
| 8148         | Light green           | SRR3360836 | De Silva et al. <sup>1</sup> |
| 8163         | Light green           | SRR3349893 | De Silva et al. <sup>1</sup> |
| 12491        | Light green           | SRR3343580 | De Silva et al. <sup>1</sup> |
| 12507        | Light green           | SRR3360826 | De Silva et al. <sup>1</sup> |
| 12508        | Light green           | SRR3361326 | De Silva et al. <sup>1</sup> |
| 1595         | Green                 | SRR3343571 | De Silva et al. <sup>1</sup> |
| 1906         | Green                 | SRR3343590 | De Silva et al. <sup>1</sup> |
| 1918         | Green                 | SRR3349722 | De Silva et al. <sup>1</sup> |
| 10316        | Green                 | ERR191801  | Grad et al. <sup>3</sup>     |
| 12527        | Green                 | SRR1661169 | Demczuk et al. <sup>2</sup>  |

| <b>MLST*</b> | <b>Lineage Colour</b> | <b>ID</b>       | <b>Study</b>                   |
|--------------|-----------------------|-----------------|--------------------------------|
| 11191        | Blue                  | SRR3361357      | De Silva et al. <sup>1</sup>   |
| 11249        | Blue                  | SRR3343519      | De Silva et al. <sup>1</sup>   |
| 11516        | Blue                  | SRR3361335      | De Silva et al. <sup>1</sup>   |
| 1590         | Cyan                  | SRR3361239      | De Silva et al. <sup>1</sup>   |
| 6722         | Cyan                  | ERR222899       | Grad et al. <sup>3</sup>       |
| 8392         | Cyan                  | SRR3360967      | De Silva et al. <sup>1</sup>   |
| 10634        | Cyan                  | SRR1661160      | Demczuk et al. <sup>2</sup>    |
| 12506        | Cyan                  | SRR3360647      | De Silva et al. <sup>1</sup>   |
| 1584         | Purple                | SRR3360942      | De Silva et al. <sup>1</sup>   |
| 1585         | Purple                | SRR3361323      | De Silva et al. <sup>1</sup>   |
| 1599         | Purple                | SRR3349220      | De Silva et al. <sup>1</sup>   |
| 1931         | Purple                | SRR3360630      | De Silva et al. <sup>1</sup>   |
| 6960         | Purple                | SRR3360982      | De Silva et al. <sup>1</sup>   |
| 8112         | Purple                | SRR3360831      | De Silva et al. <sup>1</sup>   |
| 8114         | Purple                | SRR3360766      | De Silva et al. <sup>1</sup>   |
| 8145         | Purple                | SRR3360979      | De Silva et al. <sup>1</sup>   |
| 8154         | Purple                | ERR191779       | Grad et al. <sup>3</sup>       |
| 9903         | Purple                | SRR3349206      | De Silva et al. <sup>1</sup>   |
| 10317        | Purple                | SRR3349916      | De Silva et al. <sup>1</sup>   |
| 11172        | Purple                | SRR3361300      | De Silva et al. <sup>1</sup>   |
| 12492        | Purple                | SRR3343605      | De Silva et al. <sup>1</sup>   |
| 12502        | Purple                | SRR3349967      | De Silva et al. <sup>1</sup>   |
| 12503        | Purple                | SRR3350227      | De Silva et al. <sup>1</sup>   |
| 12505        | Purple                | SRR3357184      | De Silva et al. <sup>1</sup>   |
| 12536        | Purple                | SRR1661234      | Demczuk et al. <sup>2</sup>    |
| Novel-2      | Purple                | GCA_002081015.1 | Mac Aogain et al. <sup>4</sup> |
| 1927         | Pink                  | SRR1661322      | Demczuk et al. <sup>5</sup>    |
| 6714         | Pink                  | SRR2736156      | Demczuk et al. <sup>5</sup>    |

| <b>MLST*</b> | <b>Lineage Colour</b> | <b>ID</b>       | <b>Study</b>                  |
|--------------|-----------------------|-----------------|-------------------------------|
| 10931        | Pink                  | SRR3349845      | De Silva et al. <sup>1</sup>  |
| 1580         | Grey                  | SRR3349847      | De Silva et al. <sup>1</sup>  |
| 1583         | Grey                  | SRR3360646      | De Silva et al. <sup>1</sup>  |
| 1587         | Grey                  | SRR3350112      | De Silva et al. <sup>1</sup>  |
| 1600         | Grey                  | SRR3343639      | De Silva et al. <sup>1</sup>  |
| 1893         | Grey                  | SRR3343517      | De Silva et al. <sup>1</sup>  |
| 1903         | Grey                  | SRR3360848      | De Silva et al. <sup>1</sup>  |
| 7360         | Grey                  | SRR3349272      | De Silva et al. <sup>1</sup>  |
| 7363         | Grey                  | SRR3360833      | De Silva et al. <sup>1</sup>  |
| 7365         | Grey                  | SRR3343560      | De Silva et al. <sup>1</sup>  |
| 7367         | Grey                  | SRR3360921      | De Silva et al. <sup>1</sup>  |
| 7371         | Grey                  | GCA_001858695.1 | Jacobsson et al. <sup>6</sup> |
| 7822         | Grey                  | SRR3343496      | De Silva et al. <sup>1</sup>  |
| 7823         | Grey                  | SRR3357139      | De Silva et al. <sup>1</sup>  |
| 8110         | Grey                  | ERR191735       | Grad et al. <sup>3</sup>      |
| 8123         | Grey                  | SRR3349919      | De Silva et al. <sup>1</sup>  |
| 8126         | Grey                  | SRR3360669      | De Silva et al. <sup>1</sup>  |
| 8153         | Grey                  | SRR3360956      | De Silva et al. <sup>1</sup>  |
| 8156         | Grey                  | SRR3349598      | De Silva et al. <sup>1</sup>  |
| 8775         | Grey                  | SRR3360713      | De Silva et al. <sup>1</sup>  |
| 9362         | Grey                  | SRR3357076      | De Silva et al. <sup>1</sup>  |
| 9363         | Grey                  | SRR3361108      | De Silva et al. <sup>1</sup>  |
| 9365         | Grey                  | SRR1661273      | Demczuk et al. <sup>2</sup>   |
| 10312        | Grey                  | ERR223625       | Grad et al. <sup>3</sup>      |
| 10313        | Grey                  | ERR191811       | Grad et al. <sup>3</sup>      |
| 10314        | Grey                  | ERR223658       | Grad et al. <sup>3</sup>      |
| 10315        | Grey                  | ERR222937       | Grad et al. <sup>3</sup>      |
| 10622        | Grey                  | SRR3360727      | De Silva et al. <sup>1</sup>  |



| <b>MLST*</b> | <b>Lineage Colour</b> | <b>ID</b>  | <b>Study</b>                 |
|--------------|-----------------------|------------|------------------------------|
| 10886        | Grey                  | SRR1661243 | Demczuk et al. <sup>5</sup>  |
| 10891        | Grey                  | SRR1661228 | Demczuk et al. <sup>2</sup>  |
| 11231        | Grey                  | SRR3343672 | De Silva et al. <sup>1</sup> |
| 11417        | Grey                  | SRR3360745 | De Silva et al. <sup>1</sup> |
| 11420        | Grey                  | SRR3349614 | De Silva et al. <sup>1</sup> |
| 11424        | Grey                  | SRR2736217 | Demczuk et al. <sup>5</sup>  |
| 11425        | Grey                  | SRR2736154 | Demczuk et al. <sup>5</sup>  |
| 11426        | Grey                  | SRR1661207 | Demczuk et al. <sup>5</sup>  |
| 11427        | Grey                  | SRR2736205 | Demczuk et al. <sup>5</sup>  |
| 11428        | Grey                  | SRR3350168 | De Silva et al. <sup>1</sup> |
| 11463        | Grey                  | SRR3357160 | De Silva et al. <sup>1</sup> |
| 11710        | Grey                  | SRR3349622 | De Silva et al. <sup>1</sup> |
| 11864        | Grey                  | SRR3349679 | De Silva et al. <sup>1</sup> |
| 11986        | Grey                  | SRR3360906 | De Silva et al. <sup>1</sup> |
| 11999        | Grey                  | SRR3361133 | De Silva et al. <sup>1</sup> |
| 12501        | Grey                  | SRR3349716 | De Silva et al. <sup>1</sup> |
| 12504        | Grey                  | SRR3357014 | De Silva et al. <sup>1</sup> |
| 12517        | Grey                  | SRR3349981 | De Silva et al. <sup>1</sup> |
| 12521        | Grey                  | SRR3350241 | De Silva et al. <sup>1</sup> |
| 12524        | Grey                  | SRR1661163 | Demczuk et al. <sup>2</sup>  |
| 12529        | Grey                  | SRR3360924 | De Silva et al. <sup>1</sup> |
| 12530        | Grey                  | SRR3361138 | De Silva et al. <sup>1</sup> |
| 12531        | Grey                  | SRR1661179 | Demczuk et al. <sup>2</sup>  |
| 12532        | Grey                  | SRR1661194 | Demczuk et al. <sup>2</sup>  |
| 12533        | Grey                  | SRR3361307 | De Silva et al. <sup>1</sup> |
| 12542        | Grey                  | SRR1661283 | Demczuk et al. <sup>2</sup>  |
| Novel-3      | Grey                  | SRR1661170 | Demczuk et al. <sup>2</sup>  |
| Novel-4      | Grey                  | SRR1661221 | Demczuk et al. <sup>2</sup>  |

| <b>MLST*</b> | <b>Lineage Colour</b> | <b>ID</b>  | <b>Study</b>                 |
|--------------|-----------------------|------------|------------------------------|
| Novel-5      | Grey                  | SRR1661229 | Demczuk et al. <sup>2</sup>  |
| 1579         | Yellow                | SRR3357137 | De Silva et al. <sup>1</sup> |
| 1582         | Yellow                | SRR3360912 | De Silva et al. <sup>1</sup> |
| 1588         | Yellow                | SRR3360625 | De Silva et al. <sup>1</sup> |
| 1597         | Yellow                | SRR3343586 | De Silva et al. <sup>1</sup> |
| 1601         | Yellow                | SRR3357272 | De Silva et al. <sup>1</sup> |
| 1901         | Yellow                | SRR3349848 | De Silva et al. <sup>1</sup> |
| 1902         | Yellow                | SRR3343505 | De Silva et al. <sup>1</sup> |
| 1904         | Yellow                | SRR3360917 | De Silva et al. <sup>1</sup> |
| 6959         | Yellow                | SRR2736142 | Demczuk et al. <sup>5</sup>  |
| 7827         | Yellow                | SRR3350180 | De Silva et al. <sup>1</sup> |
| 8130         | Yellow                | SRR3350132 | De Silva et al. <sup>1</sup> |
| 8143         | Yellow                | SRR3350281 | De Silva et al. <sup>1</sup> |
| 8776         | Yellow                | SRR3350174 | De Silva et al. <sup>1</sup> |
| 8784         | Yellow                | SRR3360644 | De Silva et al. <sup>1</sup> |
| 10899        | Yellow                | SRR2736118 | Demczuk et al. <sup>5</sup>  |
| 10932        | Yellow                | SRR3361315 | De Silva et al. <sup>1</sup> |
| 11194        | Yellow                | SRR3343615 | De Silva et al. <sup>1</sup> |
| 11421        | Yellow                | SRR3343669 | De Silva et al. <sup>1</sup> |
| 11956        | Yellow                | SRR3350271 | De Silva et al. <sup>1</sup> |
| 11967        | Yellow                | SRR3361223 | De Silva et al. <sup>1</sup> |
| 11979        | Yellow                | SRR3350164 | De Silva et al. <sup>1</sup> |
| 12500        | Yellow                | SRR3349197 | De Silva et al. <sup>1</sup> |
| 12519        | Yellow                | SRR3350175 | De Silva et al. <sup>1</sup> |

\*MLST, multilocus sequence type.

†MLST 7359 comprised all 94 New South Wales genomes and six Brighton genomes; MLST Novel-1 to Novel-5 represent unassigned sequence types.

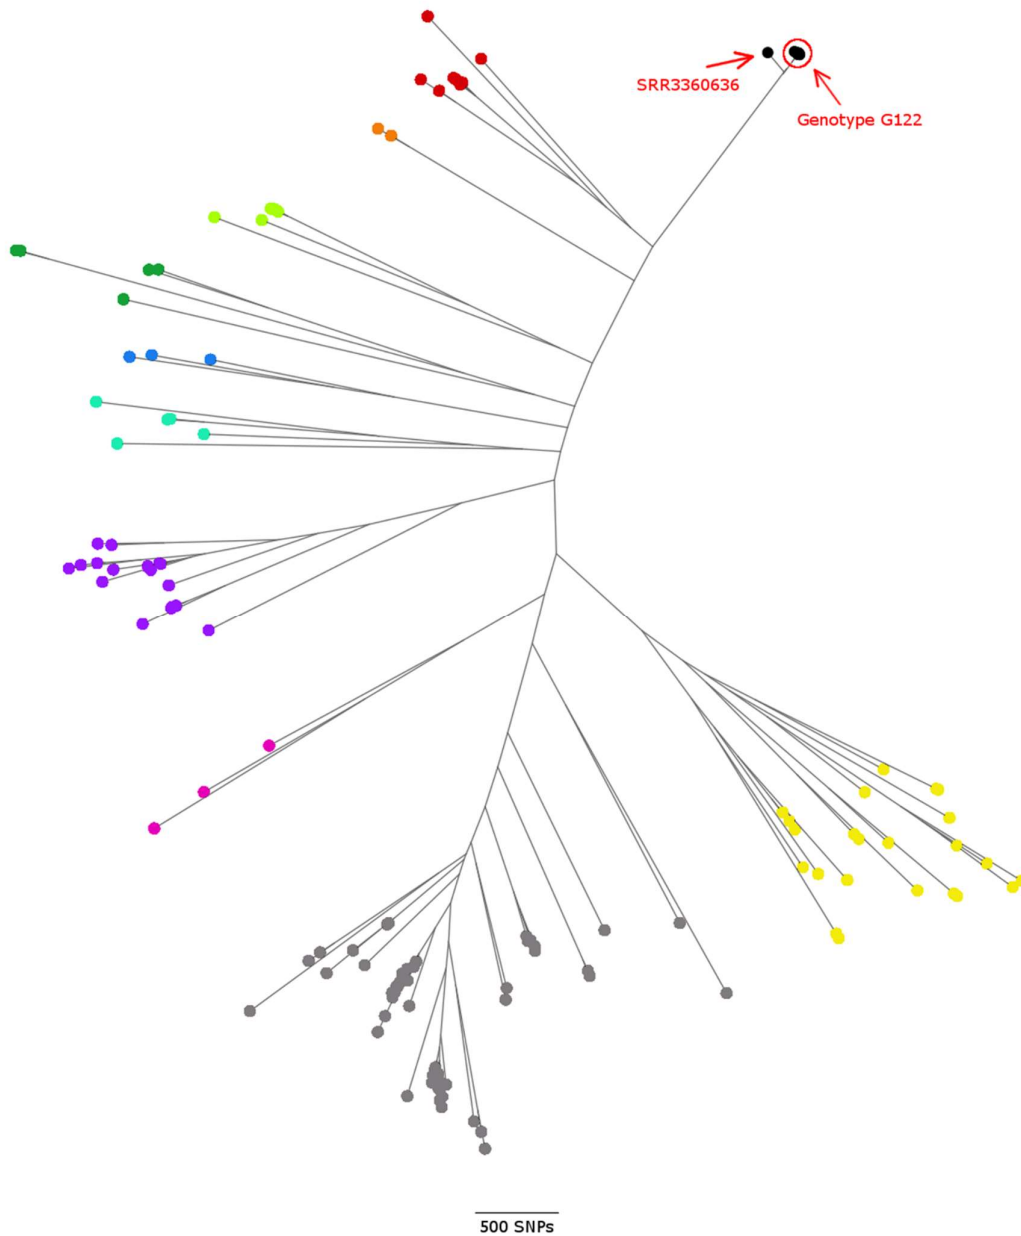

**Figure S1.** This unrooted maximum likelihood phylogeny is constructed from 16,805 core single nucleotide polymorphisms (SNPs). It comprises randomly selected isolates which are representative of distinct multilocus sequence types ( $n = 134$ ) identified from varying *Neisseria gonorrhoeae* whole genome sequencing investigations conducted elsewhere (including Canada, Brighton and surrounding areas in the United Kingdom, mainland Europe, Ireland and the United States). See Supplementary Table S5 for each isolate and its corresponding sequence type and tip colour. All isolates representing genotype G122 form a tight cluster. SRR3360636 was the next closest related lineage and hence, was selected as an appropriate outgroup to root the phylogeny depicted in Figure 1 of the main manuscript. The scale bar represents SNPs.



**Figure S2.** The predicted regions of recombination against the phylogeny produced through Gubbins. The red blocks are shared by all isolates in the phylogeny, while the blue blocks are unique to a particular isolate. With the exception of the outlying group (SRR3360636) at the top of the phylogeny, the remaining isolates (that represent genotype G122) share very similar predicted recombinant regions.

## References

- 1 De Silva, D. *et al.* Whole-genome sequencing to determine transmission of *Neisseria gonorrhoeae*: an observational study. *Lancet Infect Dis* **16**, 1295-1303, doi:10.1016/S1473-3099(16)30157-8 (2016).
- 2 Demczuk, W. *et al.* Whole-genome phylogenomic heterogeneity of *Neisseria gonorrhoeae* isolates with decreased cephalosporin susceptibility collected in Canada between 1989 and 2013. *J Clin Microbiol* **53**, 191-200, doi:10.1128/JCM.02589-14 (2015).
- 3 Grad, Y. H. *et al.* Genomic epidemiology of *Neisseria gonorrhoeae* with reduced susceptibility to cefixime in the USA: a retrospective observational study. *Lancet Infect Dis* **14**, 220-226, doi:10.1016/S1473-3099(13)70693-5 (2014).
- 4 Mac Aogain, M. *et al.* Fourteen Draft Genome Sequences for the First Reported Cases of Azithromycin-Resistant *Neisseria gonorrhoeae* in Ireland. *Genome Announc* **5**, doi:10.1128/genomeA.00403-17 (2017).
- 5 Demczuk, W. *et al.* Genomic Epidemiology and Molecular Resistance Mechanisms of Azithromycin-Resistant *Neisseria gonorrhoeae* in Canada from 1997 to 2014. *J Clin Microbiol* **54**, 1304-1313, doi:10.1128/JCM.03195-15 (2016).
- 6 Jacobsson, S. *et al.* WGS analysis and molecular resistance mechanisms of azithromycin-resistant (MIC >2 mg/L) *Neisseria gonorrhoeae* isolates in Europe from 2009 to 2014. *J Antimicrob Chemother* **71**, 3109-3116, doi:10.1093/jac/dkw279 (2016).
